# Supplementary material for: Effect of the carrier material, drying technology and dissolution media on the viability ofLactobacillus fermentumK73 during simulated gastrointestinal transit
Source: Royal Society of Chemistry journal article supplement (doi:10.1039/c9fo01091b), 2020-01-01
Supplement: c9fo01091b1.pdf [file c9fo01091b1.pdf]

1 **Supporting File of Effect of the carrier material, drying technology and dissolution media**  
2 **on the viability of *Lactobacillus fermentum* K73 during simulated gastrointestinal transit**

3 Stephania Aragón-Rojas<sup>a</sup>, Alan J. Hernández-Álvarez<sup>b</sup>, Isabelle Mainville<sup>c</sup>, Yves Arcand<sup>b\*</sup>, María  
4 X. Quintanilla-Carvajal<sup>a\*</sup>

5

6 **Table 1.** Parameter estimates with the Whiting and Buchanan model for the behaviour of

7 *Lactobacillus fermentum* K73 in the IViDiS *in vitro* digestion system and regression analysis

8 results.

| Beverage | System <sup>a</sup> | Parameter estimates <sup>b</sup> |            |                              |                              | Regression analysis <sup>c</sup> |       |       |        |                |                         |       |
|----------|---------------------|----------------------------------|------------|------------------------------|------------------------------|----------------------------------|-------|-------|--------|----------------|-------------------------|-------|
|          |                     | <i>L</i> (s)                     | F          | b                            | c                            | Bf                               | Af    | SS    | RMSE   | R <sup>2</sup> | Adjusted R <sup>2</sup> |       |
|          |                     |                                  |            | log CFU [mL s] <sub>-1</sub> | log CFU [mL s] <sub>-1</sub> |                                  |       |       |        |                |                         |       |
| Stomach  | Water               | SDWO                             | 859.188    | 0.006                        | 0.00026                      | 0.004                            | 1.017 | 1.025 | 0.011  | 0.017          | 0.999                   | 0.999 |
|          |                     | SDWM                             | 700.000    | 3.17E-06                     | 0.000                        | 0.017                            | 0.985 | 1.021 | 0.012  | 0.038          | 0.999                   | 0.999 |
|          |                     | FDWO                             | 995.331    | 0.030                        | 0.001                        | 0.004                            | 1.062 | 1.075 | 0.135  | 0.029          | 0.999                   | 0.998 |
|          |                     | FDWM                             | 1,000.552  | 0.059                        | 1.99E-04                     | 1.99E-04                         | 1.188 | 1.235 | 0.386  | 0.165          | 0.965                   | 0.957 |
|          | Milk                | SDWO                             | 4,200.000  | 3.400                        | 0.008                        | 2.00E-04                         | 0.806 | 1.239 | 2.276  | 0.022          | 0.822                   | 0.643 |
|          |                     | SDWM                             | 3,236.210  | 0.031                        | 0.00017                      | 0.004                            | 0.462 | 2.162 | 0.239  | 0.104          | 0.941                   | 0.927 |
|          |                     | FDWO                             | 3,236.210  | 0.000                        | 0.001                        | 0.002                            | 1.130 | 1.334 | 1.249  | 0.090          | 0.971                   | 0.963 |
|          |                     | FDWM                             | 1,400.000  | 0.006                        | 0.001                        | 0.001                            | 1.118 | 1.118 | 0.230  | 0.038          | 0.997                   | 0.996 |
| Duodenum | Water               | SDWO                             | 3,039.660  | 0.235                        | 9.05E-04                     | 0.0130                           | 1.012 | 1.152 | 0.273  | 0.203          | 0.726                   | 0.589 |
|          |                     | SDWM                             | -          | -                            | -                            | -                                | -     | -     | -      | -              | -                       | -     |
|          |                     | FDWO                             | 953.720    | 221.285                      | 0.002                        | 0.082                            | 1.101 | 1.186 | 0.591  | 0.122          | 0.978                   | 0.971 |
|          |                     | FDWM                             | 1,039.614  | 21.681                       | 0.0018                       | 0.008                            | 0.848 | 1.183 | 0.931  | 0.629          | 0.911                   | 0.881 |
|          | Milk                | SDWO                             | 6,839.000  | 0.387                        | -2.30E-04                    | 8.00E-05                         | 0.995 | 1.025 | 0.011  | 0.017          | 0.871                   | 0.807 |
|          |                     | SDWM                             | 10,000.000 | 0.189                        | 0.002                        | 0.0017                           | 0.415 | 2.412 | 19.410 | 0.357          | 0.713                   | 0.618 |
|          |                     | FDWO                             | 7,604.882  | 0.000                        | 2.58E-04                     | 6.77E-04                         | 0.965 | 1.110 | 0.153  | 0.018          | 0.972                   | 0.965 |
|          |                     | FDWM                             | 1,397.700  | 0.150                        | -3.00E-04                    | 0.000                            | 0.131 | 7.612 | 30.475 | 0.430          | 0.810                   | 0.763 |

9 <sup>a</sup> SDWO, spray-dried without carrier material; SDWM, spray-dried with carrier material; FDWO, freeze-dried without carrier material; FDWM,  
10 freeze-dried with carrier material.

11 <sup>b</sup> *L*, lag phase; F, *F*-statistic; b, inactivation rate of the major population group; c, inactivation rate of the minor population group; -, not examined.

12 <sup>c</sup> Bf, bias factor; Af, accuracy factor; SS, sum of squares; RMSE, root mean square error; R<sup>2</sup>, correlation coefficient; -, not examined.
